# Supplementary material for: Potassium element modulation of optical and electrical properties of the quasi-one-dimensional KxBi1−xFeO3−y system
Source: Royal Society of Chemistry journal article supplement (doi:10.1039/c2ce25565k), 2012-01-01
Supplement: c2ce25565k.pdf [file c2ce25565k.pdf]

## Supporting Information

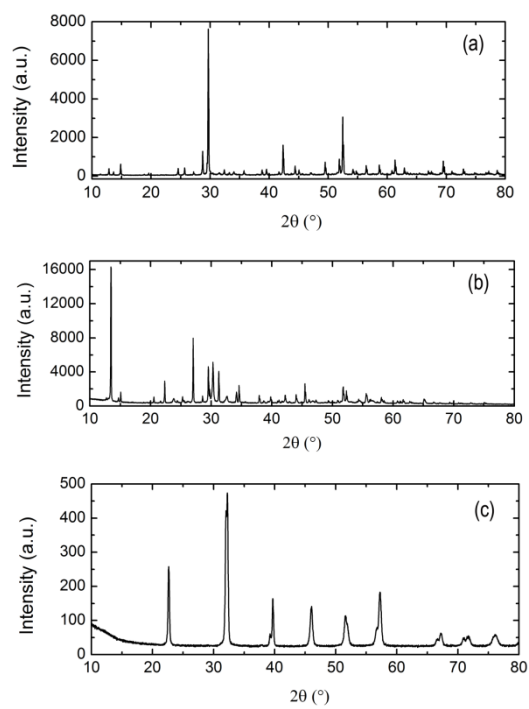

**Fig. S1** XRD patterns of as-obtained  $K_xBi_{1-x}FeO_{3-y}$  nanowires (a), microrods (b) and  $BiFeO_3$  nanoparticles (c).
